# Supplementary material for: Link between dissolved organic matter transformation and process performance in a membrane bioreactor for urinary nitrogen stabilization
Source: Royal Society of Chemistry journal article supplement (doi:10.1039/c8ew00029h), 2018-01-01
Supplement: c8ew00029h1.pdf [file c8ew00029h1.pdf]

1 **Supplementary Materials**

2

Table A.1 - Complete urine composition

|                                             | Average value | Standard deviation |
|---------------------------------------------|---------------|--------------------|
| <b>pH</b>                                   | 7.9           | ± 0.6              |
| <b>Conductivity (mS/cm)</b>                 | 17.4          | ± 5.0              |
| <b>NO<sub>2</sub><sup>-</sup>-N (mgN/L)</b> | 0.0           | ± 0.3              |
| <b>NO<sub>3</sub><sup>-</sup>-N (mgN/L)</b> | 1.1           | ± 3.7              |
| <b>Total N (mg/L)</b>                       | 6682          | ± 1488             |
| <b>COD (mgO<sub>2</sub>/L)</b>              | 7003          | ± 2062             |
| <b>COD/TN ratio</b>                         | 1.0           | ± 0.3              |
| <b>TOC (mgC/L)</b>                          | 5160          | ± 1130             |
| <b>IC (mgC/L)</b>                           | 600           | ± 550              |
| <b>SO<sub>4</sub><sup>2-</sup> (mg/L)</b>   | 907           | ± 190              |
| <b>PO<sub>4</sub><sup>3-</sup> (mg/L)</b>   | 937           | ± 192              |
| <b>Cl<sup>-</sup> (mg/L)</b>                | 4380          | ± 481              |
| <b>Na<sup>+</sup> (mg/L)</b>                | 2382          | ± 244              |
| <b>K<sup>+</sup> (mg/L)</b>                 | 2377          | ± 374              |
| <b>Ca<sup>2+</sup> (mg/L)</b>               | 155           | ± 36               |
| <b>Mg<sup>2+</sup> (mg/L)</b>               | 25            | ± 24               |

3

4 Table A.2 – Complete values of pH, conductivity, COD and TN concentrations in the feed (urine)  
5 during the 120 days of operation.

| Day | pH   | Conductivity (mS/cm) | COD (mgO <sub>2</sub> /L) | TN (mgN/L) | COD/TN |
|-----|------|----------------------|---------------------------|------------|--------|
| 1   | 7.85 | 17.09                | 8030                      | 7006       | 1.15   |
| 3   | 8.67 | 13.46                | 8810                      | 6100       | 1.44   |
| 4   | 8.25 | 21.5                 | 10100                     | 6100       | 1.66   |
| 5   | 8.19 | 22.8                 | 10600                     | 8900       | 1.19   |
| 6   | 8.53 | 23.8                 | 11600                     | 9300       | 1.25   |
| 7   | 7.17 | 17.01                | 7500                      | 7200       | 1.04   |
| 10  | 7.66 | 15.49                | 6900                      | 6300       | 1.10   |
| 11  | 7.77 | 16.2                 | 6500                      | 6400       | 1.02   |
| 12  | 7.88 | 16.65                | 6300                      | 6300       | 1.00   |
| 13  | 7.98 | 15.93                | 7600                      | 7200       | 1.06   |
| 14  | 7.72 | 18.4                 | 6900                      | 6100       | 1.13   |
| 17  | 8.19 | 17.9                 | 7400                      | 6500       | 1.14   |
| 18  | 8.21 | 19.56                | 6300                      | 5900       | 1.07   |
| 19  | 8.31 | 18.75                | 6900                      | 6500       | 1.06   |
| 20  | 8.36 | 18.96                | 7200                      | 6100       | 1.18   |
| 21  | 8.43 | 18.84                | 6900                      | 6700       | 1.03   |
| 24  | 7.71 | 17.2                 | 4600                      | 6500       | 0.71   |
| 25  | 7.78 | 14.96                | 6190                      | 6100       | 1.01   |
| 26  | 7.87 | 15.74                | 7280                      | 5900       | 1.23   |
| 27  | 7.97 | 17.07                | 6260                      | 6700       | 0.93   |
| 28  | 8.04 | 17.52                | 7380                      | 6500       | 1.14   |
| 31  | 7.79 | 19.69                | 11400                     | 6500       | 1.75   |
| 32  | 7.95 | 18.36                | 8300                      | 6100       | 1.36   |
| 33  | 8.0  | 17.6                 | 11300                     | 6500       | 1.74   |
| 34  | 6.49 | 12.11                | 4900                      | 6100       | 0.80   |
| 35  | 6.57 | 12.5                 | 5800                      | 5700       | 1.02   |

|     |       |       |       |      |      |
|-----|-------|-------|-------|------|------|
| 38  | 7.02  | 13.27 | 6150  | 5900 | 1.04 |
| 39  | 7.09  | 12.66 | 6320  | 6050 | 1.04 |
| 40  | 7.22  | 15.03 | 6500  | 6000 | 1.08 |
| 41  | 7.19  | 17.26 | 6690  | 7700 | 0.87 |
| 42  | 7.36  | 17.2  | 7060  | 8050 | 0.88 |
| 45  | 7.505 | 17.38 | 6120  | 6100 | 1.00 |
| 46  | 7.61  | 17.25 | 6290  | 6900 | 0.91 |
| 47  | 7.69  | 17.65 | 6420  | 7700 | 0.83 |
| 48  | 7.75  | 17.77 | 6210  | 5000 | 1.24 |
| 49  | 7.85  | 17.74 | 6660  | 7100 | 0.94 |
| 52  | 8.04  | 10.8  | 6370  | 6500 | 0.98 |
| 53  | 7.81  | 17.88 | 5110  | 6300 | 0.81 |
| 55  | 7.91  | 9.66  | 5960  | 4700 | 1.27 |
| 56  | 7.97  | 9.96  | 6170  | 5900 | 1.05 |
| 59  | 8.24  | 10.17 | 5760  | 5700 | 1.01 |
| 60  | 8.19  | 10.6  | 5500  | 6100 | 0.90 |
| 61  | 8.12  | 10.05 | 5320  | 6100 | 0.87 |
| 62  | 8.14  | 17.72 | 6260  | 5200 | 1.20 |
| 63  | 8.25  | 17.64 | 6690  | 5100 | 1.31 |
| 66  | 8.58  | 16.84 | 5430  | 4200 | 1.29 |
| 67  | 8.69  | 18.32 | 6000  | 6100 | 0.98 |
| 68  | 8.18  | 18.42 | 6010  | 7200 | 0.83 |
| 69  | 8.05  | 16.07 | 6150  | 6143 | 1.00 |
| 70  | 8.14  | 16.47 | 5980  | 3100 | 1.93 |
| 73  | 8.46  | 17.19 | 5810  | 4300 | 1.35 |
| 74  | 8.6   | 19.53 | 5700  | 5000 | 1.14 |
| 75  | 8.72  | 19.85 | 4910  | 4300 | 1.14 |
| 76  | 8.72  | 20.3  | 5400  | 4000 | 1.35 |
| 77  | 8.89  | 20.9  | -     | 6800 | -    |
| 80  | 9.3   | 38.8  | 5030  | 7600 | 0.66 |
| 81  | 9.32  | 40.8  | 5460  | 7300 | 0.75 |
| 82  | 6.53  | 16.7  | 4650  | 8000 | 0.58 |
| 83  | 6.56  | 12.82 | 5510  | 8100 | 0.68 |
| 86  | 6.77  | 12.46 | 5240  | 7600 | 0.69 |
| 87  | 6.85  | 13.17 | 4950  | 8300 | 0.60 |
| 88  | 6.94  | 13.28 | 2080  | 7800 | 0.27 |
| 89  | 6.93  | 19.36 | 10100 | 8300 | 1.22 |
| 90  | 7.04  | 17.16 | 4540  | 9400 | 0.48 |
| 96  | 7.65  | 21    | 9770  | 7200 | 1.36 |
| 97  | 7.69  | 10.3  | 11100 | 8600 | 1.29 |
| 111 | 7.84  | 20.6  | 10900 | 8200 | 1.33 |
| 112 | 7.95  | 18.88 | 11200 | 8600 | 1.30 |
| 113 | 7.97  | 20.8  | 10800 | 7500 | 1.44 |
| 114 | 8.0   | 21.5  | 10500 | 8000 | 1.31 |
| 117 | 8.08  | 21.5  | 10500 | 6800 | 1.54 |
| 118 | 8.19  | 22.7  | 10600 | 7300 | 1.45 |
| 119 | 8.12  | 18.52 | 6420  | 6100 | 1.05 |
| 120 | 8.37  | 11.2  | 5590  | 7600 | 0.74 |

6

7 Table A.3 – Complete values of pH, conductivity, COD, TN, NO<sub>2</sub><sup>-</sup> and NH<sub>4</sub><sup>+</sup> concentrations in the  
8 MBR permeate during the 120 days of operation.

| Day | pH   | Conductivity<br>(mS/cm) | COD<br>(mgO <sub>2</sub> /L) | TN<br>(mgN/L) | NO <sub>2</sub> <sup>-</sup><br>(mgN/L) | NH <sub>4</sub> <sup>+</sup><br>(mgN/L) |
|-----|------|-------------------------|------------------------------|---------------|-----------------------------------------|-----------------------------------------|
| 1   | 6.44 | 8.87                    | -                            | -             | 0                                       | 72.8                                    |
| 3   | 7.03 | 3.32                    | 164                          | 372           | 14.0                                    | 165.1                                   |
| 4   | 6.8  | 3.42                    | 94                           | 372           | 11.5                                    | 142.7                                   |
| 5   | 6.81 | 3.76                    | 81                           | 543           | 14.1                                    | 125.7                                   |

|    |      |       |     |      |       |       |
|----|------|-------|-----|------|-------|-------|
| 6  | 6.85 | 4.05  | 24  | 727  | 14.8  | 92.4  |
| 7  | 6.95 | 4.41  | 55  | 563  | 24.8  | 72.0  |
| 10 | 6.82 | 3.86  | 61  | 492  | 1.6   | 0     |
| 11 | 6.79 | 4.13  | 34  | 653  | 9.9   | 4.8   |
| 12 | 6.82 | 4.48  | 50  | 589  | 2.3   | 8.6   |
| 13 | 6.85 | 4.31  | 47  | 673  | 0.0   | 0     |
| 14 | 6.79 | 4.6   | 40  | 678  | 1.8   | 0     |
| 17 | 6.67 | 5.04  | 61  | 793  | 1.4   | 0     |
| 18 | 7.01 | 5.45  | 45  | 908  | 1.9   | 0     |
| 19 | 6.86 | 6.59  | 56  | 1000 | 6.9   | 11.2  |
| 20 | 6.56 | 6.72  | 59  | 1109 | 7.3   | 0     |
| 21 | 7.22 | 7.06  | 64  | 1218 | 4.9   | 0     |
| 24 | 6.66 | 8.06  | 78  | 1182 | 29.3  | 106.1 |
| 25 | 6.82 | 8.23  | 84  | 1109 | 33.5  | 57.2  |
| 26 | 6.61 | 7.88  | 86  | 1073 | 5.2   | 0     |
| 27 | 6.63 | 7.43  | 78  | 1314 | 5.0   | 0     |
| 28 | 6.6  | 8.21  | 139 | 1275 | 9.9   | 0     |
| 31 | 6.63 | 9.79  | 122 | 1275 | 25.1  | 11.0  |
| 32 | 6.45 | 10.8  | 100 | 1196 | 23.9  | 30.2  |
| 33 | 6.46 | 10.83 | 151 | 1275 | 12.8  | 62.6  |
| 34 | 6.09 | 10.11 | 106 | 1196 | 5.8   | 0     |
| 35 | 6.13 | 9     | 92  | 1118 | 2.5   | 10.8  |
| 38 | 6.44 | 7.77  | -   | 1157 | 137.8 | 151.8 |
| 39 | 6.57 | 6.16  | -   | 1186 | 90.7  | 39.2  |
| 40 | 6.79 | 7.15  | -   | 1176 | 135.4 | 23.7  |
| 41 | 6.98 | 6.29  | 77  | 626  | 1.1   | 0     |
| 42 | 7.42 | 5.62  | 61  | 885  | 0.0   | 0     |
| 45 | -    | 1.645 | 32  | 670  | 0.0   | 0     |
| 46 | 6.97 | 2.7   | 66  | 561  | 0.3   | 0     |
| 47 | 7.00 | 3.09  | 43  | 626  | 0     | 0     |
| 48 | 6.98 | 3.77  | 44  | 407  | 19.8  | 0     |
| 49 | 6.97 | 4.19  | 59  | 577  | 7.1   | 0     |
| 52 | 7.17 | 3.17  | 45  | 542  | 0     | 0     |
| 53 | 6.91 | 3.88  | 36  | 692  | 0     | 0     |
| 55 | 6.77 | 5.22  | 55  | 516  | 0     | 0     |
| 56 | 6.79 | 5.68  | 51  | 819  | 0     | 0     |
| 59 | 7.63 | 6.89  | 46  | 950  | 0     | 0     |
| 60 | 7.34 | 7.75  | 44  | 1017 | 0     | 0     |
| 61 | 6.96 | 8.47  | 54  | 1017 | 0     | 0.7   |
| 62 | 7.96 | 8.64  | 60  | 867  | 0     | 3     |
| 63 | 7.9  | 8.78  | 43  | 981  | 22.8  | 4.3   |
| 66 | 7.93 | 10.54 | 70  | 933  | 0     | 7.1   |
| 67 | 7.8  | 10.66 | 70  | 1356 | 0     | 0     |
| 68 | 7.17 | 11.61 | 116 | 1600 | 0     | 9.1   |
| 69 | 6.45 | 11.21 | 70  | 1365 | 0     | 35.5  |
| 70 | 7.01 | 11.72 | 64  | 775  | 0     | 0.101 |
| 73 | 6.95 | 13.1  | 75  | 1194 | 0     | 0     |
| 74 | 6.98 | 14.82 | 64  | 1389 | 0     | 0     |
| 75 | 6.99 | 14.22 | 57  | 1194 | 0     | 14.5  |
| 76 | 7.14 | 13.91 | 35  | 1212 | 0     | 15.9  |
| 77 | 7.01 | 14.72 | -   | 2061 | 0     | 0     |
| 80 | 6.89 | 17.93 | 90  | 2303 | 0     | 32.9  |
| 81 | 6.89 | 18.56 | 95  | 2317 | 0     | 28.6  |
| 82 | 6.86 | 18.5  | 95  | 2540 | 0     | 42.5  |
| 83 | 6.85 | 17.51 | 89  | 2803 | 0     | 44.2  |
| 86 | 6.76 | 15.14 | 78  | 1886 | 0     | 39.2  |
|    | 6.88 | 13.96 | 58  | 2060 | 0     | 28.6  |
| 87 |      |       |     |      |       |       |
|    | 6.91 | 14    | 51  | 1935 | 0     | 25.4  |
| 88 |      |       |     |      |       |       |

|     |      |       |     |      |   |      |
|-----|------|-------|-----|------|---|------|
| 89  | 6.94 | 13.54 | 64  | 2060 | 0 | 0    |
| 90  | 6.9  | 13.7  | 57  | 2084 | 0 | 38.7 |
| 96  | 6.94 | 11.28 | 43  | 1787 | 0 | 43.2 |
| 97  | 6.94 | 12.05 | 51  | 2134 | 0 | 29.4 |
| 111 | 6.96 | 9.49  | 49  | 2035 | 0 | 22.5 |
| 112 | 7.0  | 11.44 | 53  | 2257 | 0 | 36.5 |
| 113 | 6.84 | 12.2  | 61  | 1969 | 0 | 57.5 |
| 114 | 7.32 | 9.95  | 31  | 2100 | 0 | 0    |
| 117 | 7.32 | 9.95  | 31  | 1785 | 0 | 0    |
| 118 | 6.97 | 13.3  | 55  | 1916 | 0 | 0    |
| 119 | 6.99 | 13.8  | 72  | 1601 | 0 | 0    |
| 120 | 6.95 | -     | 118 | 1995 | 0 | 0    |

9  
10

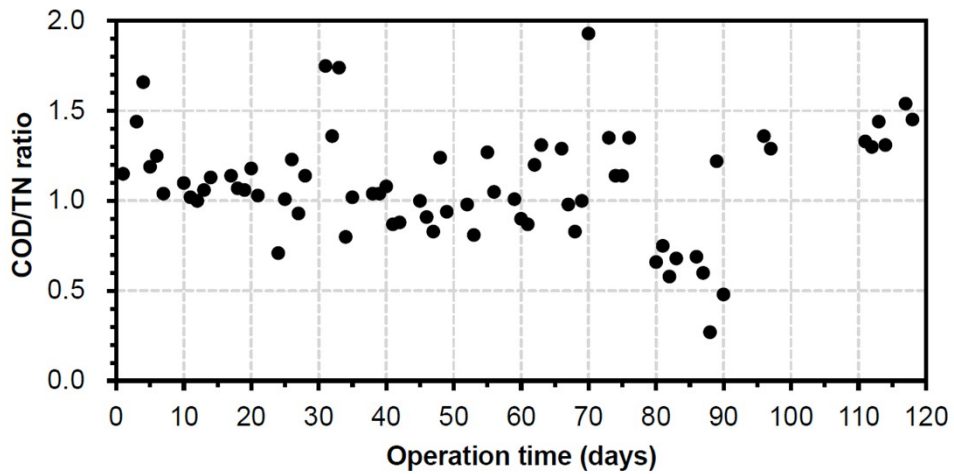

11  
12  
13  
14  
15  
16

Figure A.1 - Variations of COD/TN ratio in urine and conductivity in the MBR over time

Figure A.2 – Variations of TMP and membrane permeability over time

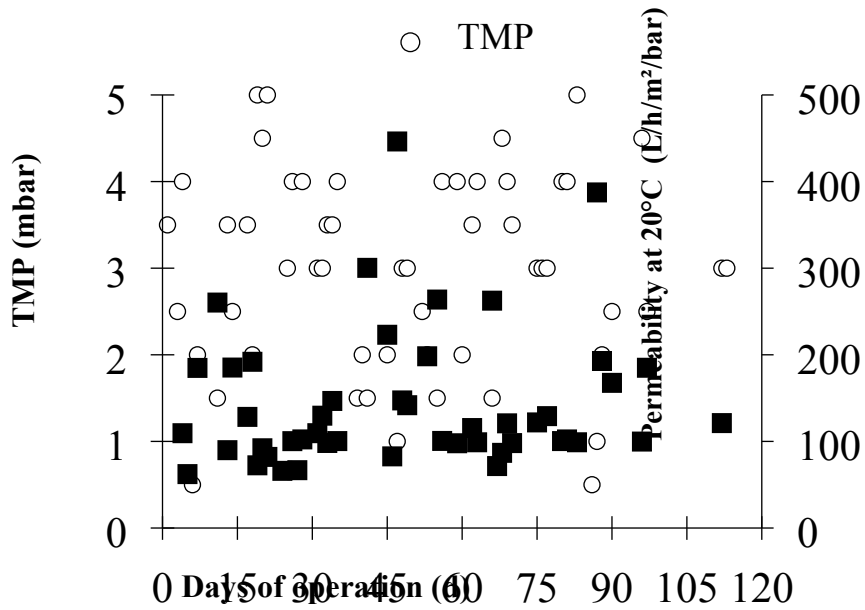

17
